# Supplementary material
Source: publisher site journal article supplement (https://www.thieme-connect.de/media/10.1055-s-00035024/200802/supmat/10-1160-th07-07-0448-supp1.pdf)

**Online Supplementary Data to Zürcher et al. “Stability of coagulation assays performed in plasma from citrated whole blood transported at ambient temperature“ in *Thromb Haemost* 2008; 99 (2)**

Supplemental Data Fig. 1A (aPTT)

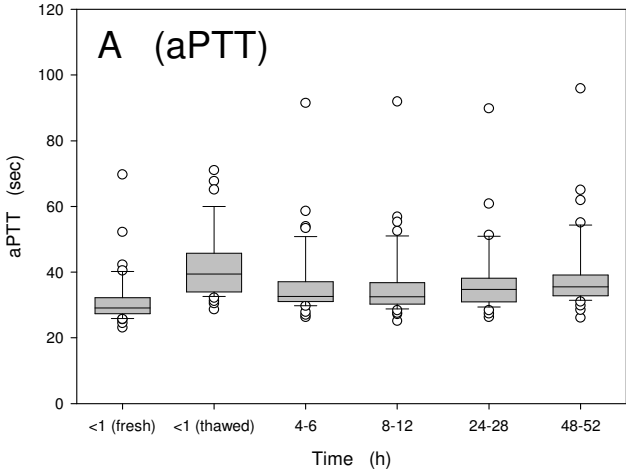

Supplemental Data Fig. 1A (FV:C)

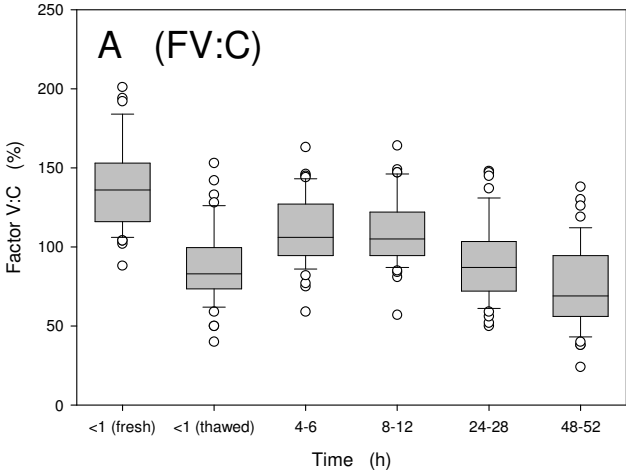

Supplemental Data Fig. 1A (FVIII:C)

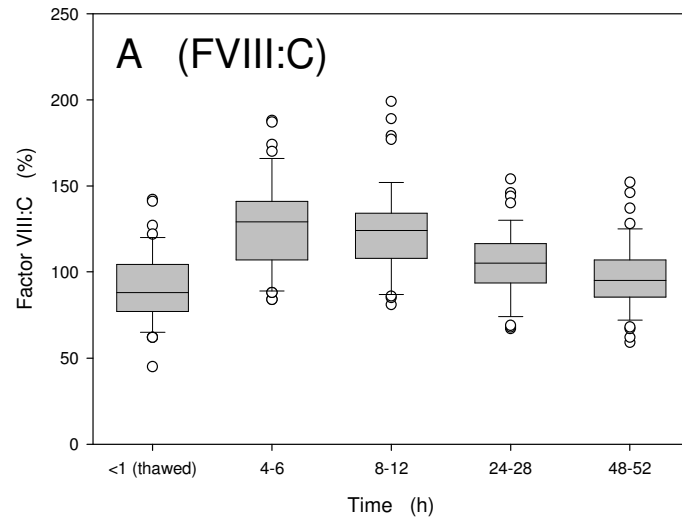

Supplemental Data Fig. 1B (aPTT)

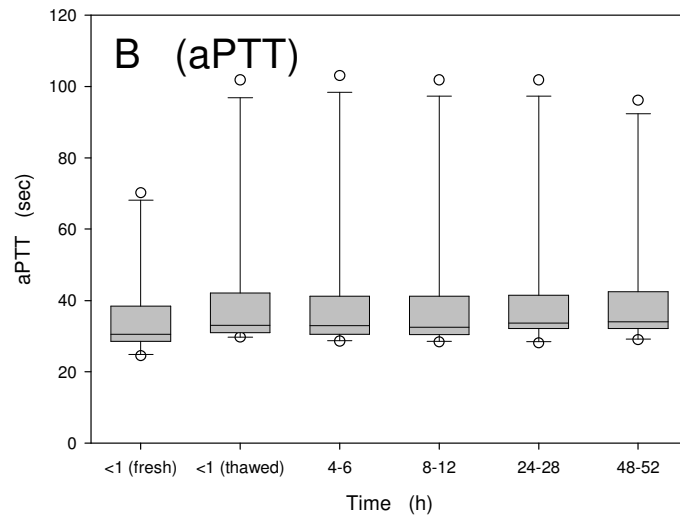

Supplemental Data Fig. 1B (FV:C)

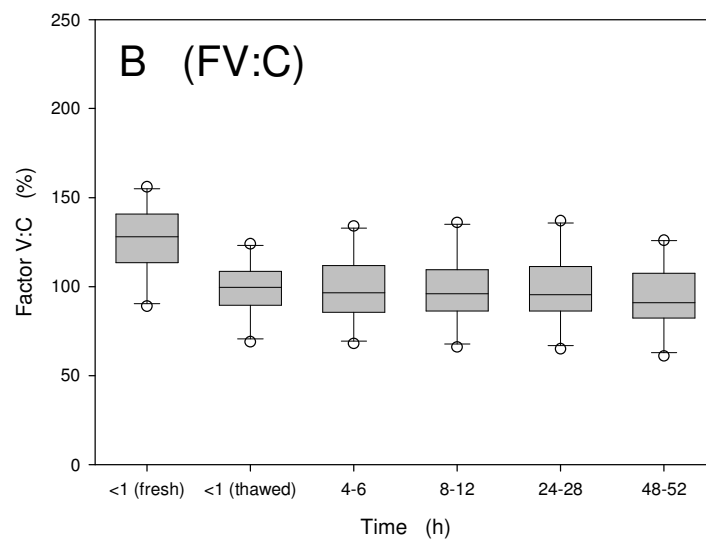

Supplemental Data Fig. 1B (FVIII:C)

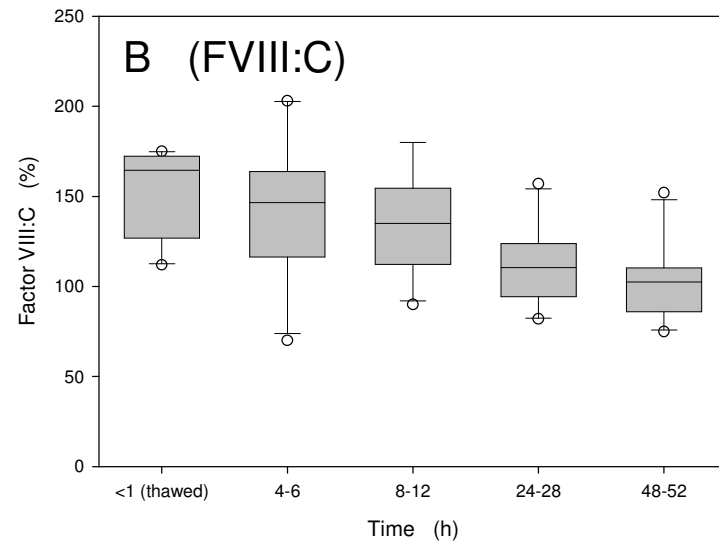

Supplement: Supplementary file 1 [file 10-1160-th07-07-0448-supp1.pdf]
